# Supplementary material for: Luminescence and energy transfer properties of Ca8Gd2(PO4)6O2:A (A = Ce3+/Eu2+/Tb3+/Dy3+/Mn2+) phosphors
Source: Royal Society of Chemistry journal article supplement (doi:10.1039/c2jm34092e), 2012-01-01
Supplement: c2jm34092e.pdf [file c2jm34092e.pdf]

## Electronic Supplementary Information (ESI)

The study process on the energy transfer mechanism of  $\text{Ce}^{3+} \rightarrow \text{Eu}^{2+}$  ion pair in the CGPO host is illustrated in detail as follows:

In order to validate the energy transfer from  $\text{Ce}^{3+}$  to  $\text{Eu}^{2+}$ , we first investigated the decay curves of  $\text{Ce}^{3+}$  in the CGPO host. The decay curve of CGPO:  $9\text{Ce}^{3+}$  has been analyzed by curve fitting, as shown in Figure S5a. When  $\text{Eu}^{2+}$  ions are introduced, the decays deviate from exponential. Figure S5b shows the representative decay curves of  $\text{Ce}^{3+}$  emission in CGPO:  $9\text{Ce}^{3+}$ ,  $y\text{Eu}^{2+}$  ( $y = 1, 4$ ) samples excited at 314 nm and monitored at 415 nm, which are displayed on a logarithmic intensity scale. It can be observed that the deviation is more evident with the increase of the  $\text{Eu}^{2+}$  doping content, and the decay of the  $\text{Ce}^{3+}$  ions become faster and faster attributed to the energy transfer from the  $\text{Ce}^{3+}$  to  $\text{Eu}^{2+}$  ions. Since the deviations from exponential decay, the average fluorescence lifetime was defined as following formula:<sup>1</sup>

$$\tau_{\text{avg}} = \frac{\int_0^{\infty} tI(t)dt}{\int_0^{\infty} I(t)dt} \quad (1)$$

Where  $I(t)$  is the fluorescence intensity at time  $t$  with normalized initial intensity. The average lifetimes of  $\text{Ce}^{3+}$  as a function of different  $\text{Eu}^{2+}$  concentration were calculated and shown in Figure S5c (black line). It can be seen that the lifetime of the  $\text{Ce}^{3+}$  emission shortens with increasing doping content of  $\text{Eu}^{2+}$ , which strongly supports the energy transfer from the  $\text{Ce}^{3+}$  to  $\text{Eu}^{2+}$  ions. In addition, the energy transfer efficiency from  $\text{Ce}^{3+}$  to  $\text{Eu}^{2+}$  was also investigated. Generally, the energy transfer efficiency from a sensitizer to activator can be expressed as the following equation<sup>2-4</sup>

$$\eta_T = 1 - \frac{\tau_s}{\tau_{s0}} \quad (2)$$

Where  $\eta_T$  is the energy transfer efficiency,  $\tau_{s0}$  and  $\tau_s$  are the lifetime of the  $\text{Ce}^{3+}$  sensitizer in the absence and presence of  $\text{Eu}^{2+}$  ions, respectively. As a consequence, the  $\eta_T$  values from  $\text{Ce}^{3+}$  to  $\text{Eu}^{2+}$  in CGPO:  $9\text{Ce}^{3+}$ ,  $y\text{Eu}^{2+}$  samples were calculated as a function of  $y$  and represented in Figure S4c (blue

line). It can be observed that the energy transfer efficiency increases with increasing  $\text{Eu}^{2+}$  concentration. However, the increasing rate of the energy transfer efficiency gradually decreases with the increase of  $\text{Eu}^{2+}$  concentration. These results reveal that the energy transfer from  $\text{Ce}^{3+}$  to  $\text{Eu}^{2+}$  has a trend to saturation with a continuous increase of  $\text{Eu}^{2+}$  concentration due to the fixed  $\text{Ce}^{3+}$  concentration. The maximum energy transfer efficiency can reach 65%. The above results indicate that the energy transfer from  $\text{Ce}^{3+}$  to  $\text{Eu}^{2+}$  is efficient.

On the basis of Dexter's energy transfer expressions of multipolar interaction and Reisfeld's approximation, the following relation can be given as <sup>5,6</sup>

$$\ln \frac{\eta_{S0}}{\eta_S} \propto C \quad (3)$$

$$\frac{\eta_{S0}}{\eta_S} \propto C^{n/3} \quad (4)$$

where  $\eta_{S0}$  and  $\eta_S$  are the luminescence quantum efficiencies of  $\text{Ce}^{3+}$  in the absence and presence of  $\text{Eu}^{2+}$ , respectively;  $C$  is the total doping concentration of the  $\text{Ce}^{3+}$  and  $\text{Eu}^{2+}$  ions; eq 3 corresponds to the exchange interaction and eq 4 with  $n = 6, 8,$  and  $10$  corresponds to dipole-dipole, dipole-quadrupole, and quadrupole-quadrupole interactions, respectively. The value of  $\eta_{S0}/\eta_S$  can be approximately estimated from the related lifetime's ratio ( $\tau_{S0}/\tau_S$ ). Thus, eqs. 3 and 4 can be represented by the following equation:

$$\ln \frac{\tau_{S0}}{\tau_S} \propto C \quad (5)$$

$$\frac{\tau_{S0}}{\tau_S} \propto C^{n/3} \quad (6)$$

The relationships of  $\ln(\tau_{S0}/\tau_S) \propto C$  and  $(\tau_{S0}/\tau_S) \propto C^{n/3}$  are illustrated in Figure S6, in which a linear behavior was observed only when  $n = 6$ , implying that energy transfer from  $\text{Ce}^{3+}$  to  $\text{Eu}^{2+}$  occurs via a dipole-dipole mechanism.

1 L. Shi, Y. L. Huang and H. J. Seo, *J. Phys. Chem. A*, 2010, **114**, 6927.

2 (a) W. J. Yang and T. M. Chen, *Appl. Phys. Lett.*, 2006, **88**, 101903; (b) A. Kar, A. Datta and A. Patra,  
*J. Mater. Chem.*, 2010, **20**, 916.

3 K. H. Kwon, W. B. Im, H. S. Jang, H. S. Yoo and D. Y. Jeon, *Inorg. Chem.*, 2009, **48**, 11525.

4 P. I. Paulose, G. Jose, V. Thomas, N. V. Unnikrishnan and K. R. M. Warriar, *J. Phys. Chem. Solids*,  
2003, **64**, 841.

5 D. L. Dexter, *J. Chem. Phys.*, 1953, **21**, 836.

6 G. Blasse, *Philips. Res. Rep.*, 1969, **24**, 131.

10

15

20

25

**Table S1.** Structure parameters of  $\text{Ca}_8\text{Gd}_2(\text{PO}_4)_6\text{O}_2$  and ionic radii ( $\text{\AA}$ ) for given coordination number (CN) of  $\text{Gd}^{3+}$ ,  $\text{Ca}^{2+}$ ,  $\text{Ce}^{3+}$ ,  $\text{Eu}^{2+}$ ,  $\text{Tb}^{3+}$ ,  $\text{Dy}^{3+}$ , and  $\text{Mn}^{2+}$  ions.

5

| Ion              | Space group                               | Sites | Symmetry                | Ionic radius (IR) ( $\text{\AA}$ ) |        |
|------------------|-------------------------------------------|-------|-------------------------|------------------------------------|--------|
|                  |                                           |       |                         | CN = 9                             | CN = 7 |
| $\text{Gd}^{3+}$ |                                           | 6h    | $\text{C}_s$            | 1.107                              | 1.00   |
| $\text{Ca}^{2+}$ |                                           | 6h/4f | $\text{C}_s/\text{C}_3$ | 1.180                              | 1.06   |
| $\text{Ce}^{3+}$ | Hexagonal<br>$\text{P6}_3/\text{m}$ (176) |       |                         | 1.196                              | 1.07   |
| $\text{Eu}^{2+}$ |                                           |       |                         | 1.300                              | 1.20   |
| $\text{Tb}^{3+}$ |                                           |       |                         | 1.095                              | 0.98   |
| $\text{Dy}^{3+}$ |                                           |       |                         | 1.083                              | 0.97   |
| $\text{Mn}^{2+}$ |                                           |       |                         | —                                  | 0.9    |

10

15

**Table S2.** Cell parameters of CGPO: A (A = Ce<sup>3+</sup>, Eu<sup>2+</sup>, Mn<sup>2+</sup>, Tb<sup>3+</sup>, Dy<sup>3+</sup>) samples at different A concentration.

5

| Sample                                      | Cell parameter | a = b (Å) | c (Å)   | V (Å <sup>3</sup> ) |
|---------------------------------------------|----------------|-----------|---------|---------------------|
| CGPO: 1Eu <sup>2+</sup>                     |                | 9.39392   | 6.87661 | 525.53              |
| CGPO: 3Eu <sup>2+</sup>                     |                | 9.40563   | 6.88662 | 527.61              |
| CGPO: 5Eu <sup>2+</sup>                     |                | 9.41216   | 6.88948 | 528.56              |
| CGPO: 3Ce <sup>3+</sup>                     |                | 9.38182   | 6.87349 | 523.94              |
| CGPO: 7Ce <sup>3+</sup>                     |                | 9.38722   | 6.87810 | 524.90              |
| CGPO: 10Ce <sup>3+</sup>                    |                | 9.39655   | 6.87974 | 526.07              |
| CGPO: 3Tb <sup>3+</sup>                     |                | 9.36707   | 6.86741 | 521.83              |
| CGPO: 5Tb <sup>3+</sup>                     |                | 9.36069   | 6.86105 | 521.75              |
| CGPO: 10Tb <sup>3+</sup>                    |                | 9.34256   | 6.85782 | 518.38              |
| CGPO: 4Mn <sup>2+</sup>                     |                | 9.37956   | 6.86953 | 523.39              |
| CGPO: 7Mn <sup>2+</sup>                     |                | 9.37870   | 6.86938 | 523.28              |
| CGPO: 10Mn <sup>2+</sup>                    |                | 9.37743   | 6.86739 | 522.99              |
| CGPO: 9Ce <sup>3+</sup> , 2Dy <sup>3+</sup> |                | 9.36997   | 6.86817 | 522.21              |
| CGPO: 9Ce <sup>3+</sup> , 4Dy <sup>3+</sup> |                | 9.36899   | 6.86557 | 521.91              |
| CGPO: 9Ce <sup>3+</sup> , 8Dy <sup>3+</sup> |                | 9.36427   | 6.85924 | 520.9               |

10

15

**Table S3.** Quantum yields (QYs) and chromaticity coordinates of the Ce<sup>3+</sup> and/or Eu<sup>2+</sup> doped CGPO samples under UV excitation.

5

| CGPO                                        | Quantum yields (%)<br>$\lambda_{\text{ex}} = 314 \text{ nm}$ |
|---------------------------------------------|--------------------------------------------------------------|
| CGPO: 1Ce <sup>3+</sup>                     | 66                                                           |
| CGPO: 3Ce <sup>3+</sup>                     | 72                                                           |
| CGPO: 4Ce <sup>3+</sup>                     | 76                                                           |
| CGPO: 5Ce <sup>3+</sup>                     | 82                                                           |
| CGPO: 7Ce <sup>3+</sup>                     | 84                                                           |
| CGPO: 9Ce <sup>3+</sup>                     | 88 (0.166, 0.117)                                            |
| CGPO: 10Ce <sup>3+</sup>                    | 85                                                           |
| CGPO: 15Ce <sup>3+</sup>                    | 83                                                           |
|                                             | $\lambda_{\text{ex}} = 300 \text{ nm}$                       |
| CGPO: 1Eu <sup>2+</sup>                     | 12                                                           |
| CGPO: 3Eu <sup>2+</sup>                     | 17                                                           |
| CGPO: 4Eu <sup>2+</sup>                     | 19 (0.161, 0.106)                                            |
| CGPO: 5Eu <sup>2+</sup>                     | 18                                                           |
| CGPO: 6Eu <sup>2+</sup>                     | 16                                                           |
| CGPO: 7Eu <sup>2+</sup>                     | 14                                                           |
| CGPO: 8Eu <sup>2+</sup>                     | 13                                                           |
| CGPO: 10Eu <sup>2+</sup>                    | 9                                                            |
| CGPO: 15Eu <sup>2+</sup>                    | 8                                                            |
|                                             | $\lambda_{\text{ex}} = 314 \text{ nm}$                       |
| CGPO : 9Ce <sup>3+</sup>                    | 88                                                           |
| CGPO: 9Ce <sup>3+</sup> , 1Eu <sup>2+</sup> | 60                                                           |
| CGPO: 9Ce <sup>3+</sup> , 3Eu <sup>2+</sup> | 33.5 (0.165, 0.108)                                          |
| CGPO: 9Ce <sup>3+</sup> , 4Eu <sup>2+</sup> | 28                                                           |
| CGPO: 9Ce <sup>3+</sup> , 5Eu <sup>2+</sup> | 22                                                           |
| CGPO: 9Ce <sup>3+</sup> , 6Eu <sup>2+</sup> | 22                                                           |
| CGPO: 9Ce <sup>3+</sup> , 7Eu <sup>2+</sup> | 20                                                           |
| CGPO: 9Ce <sup>3+</sup> , 8Eu <sup>2+</sup> | 16                                                           |
| CGPO: 9Ce <sup>3+</sup> , 9Eu <sup>2+</sup> | 14                                                           |

10

**Table S4.** CIE chromaticity coordinates (x, y) of the CGPO: Ce<sup>3+</sup>, Tb<sup>3+</sup>, Dy<sup>3+</sup>, Mn<sup>2+</sup> under low voltage electron beam (Accelerating Voltage = 3.5 kV; Filament Current = 91 mA)

5

| point | sample                                       | Chromaticity coordinates (x, y) |
|-------|----------------------------------------------|---------------------------------|
| 1     | CGPO: 9Ce <sup>3+</sup>                      | (0.190, 0.162)                  |
| 2     | CGPO: 9Ce <sup>3+</sup> , 1Tb <sup>3+</sup>  | (0.196, 0.199)                  |
| 3     | CGPO: 9Ce <sup>3+</sup> , 3Tb <sup>3+</sup>  | (0.209, 0.269)                  |
| 4     | CGPO: 9Ce <sup>3+</sup> , 7Tb <sup>3+</sup>  | (0.241, 0.459)                  |
| 5     | CGPO: 9Tb <sup>3+</sup>                      | (0.283, 0.520)                  |
| 6     | CGPO: 9Ce <sup>3+</sup> , 4Dy <sup>3+</sup>  | (0.230, 0.213)                  |
| 7     | CGPO: 9Ce <sup>3+</sup> , 8Dy <sup>3+</sup>  | (0.265, 0.252)                  |
| 8     | CGPO: 9Dy <sup>3+</sup>                      | (0.352, 0.371)                  |
| 9     | CGPO: 9Ce <sup>3+</sup> , 5Mn <sup>2+</sup>  | (0.219, 0.219)                  |
| 10    | CGPO: 9Ce <sup>3+</sup> , 10Mn <sup>2+</sup> | (0.253, 0.279)                  |
| 11    | CGPO: 9Ce <sup>3+</sup> , 18Mn <sup>2+</sup> | (0.286, 0.332)                  |
| 12    | CGPO: 7Mn <sup>2+</sup>                      | (0.343, 0.473)                  |

10

15

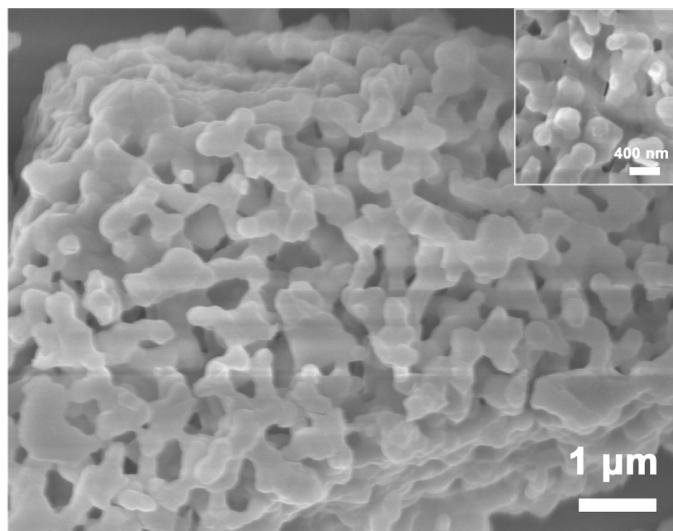

5

**Figure S1.** SEM image of CGPO: Ce<sup>3+</sup>, Eu<sup>2+</sup> sample.

10

15



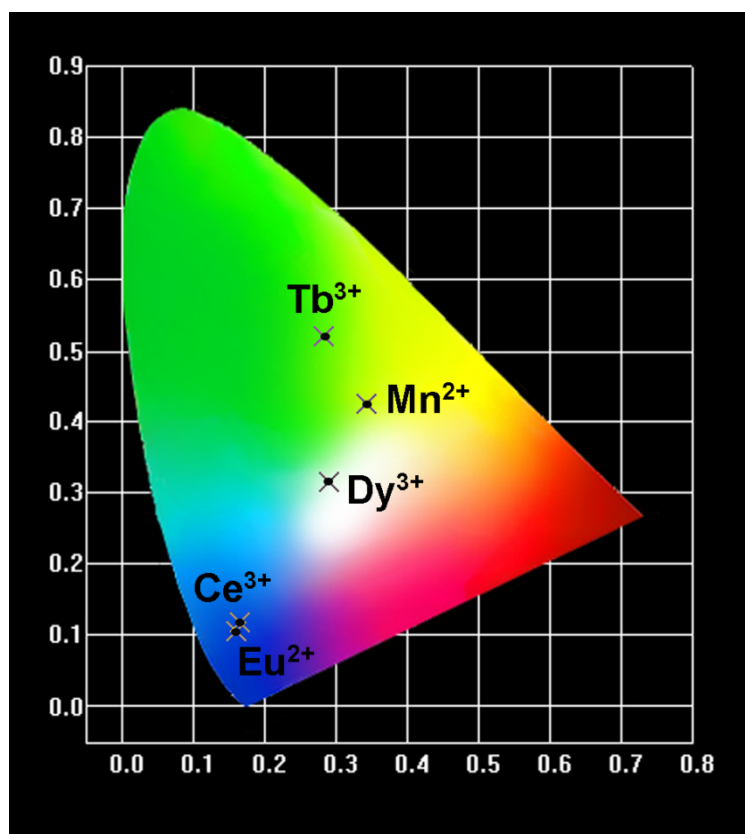

Figure S2. The CIE chromaticity diagram for CGPO: 9Ce<sup>3+</sup> and CGPO: 4Eu<sup>2+</sup>, CGPO: 9Tb<sup>3+</sup>, CGPO: 3Dy<sup>3+</sup>, CGPO: 5Mn<sup>2+</sup> samples.

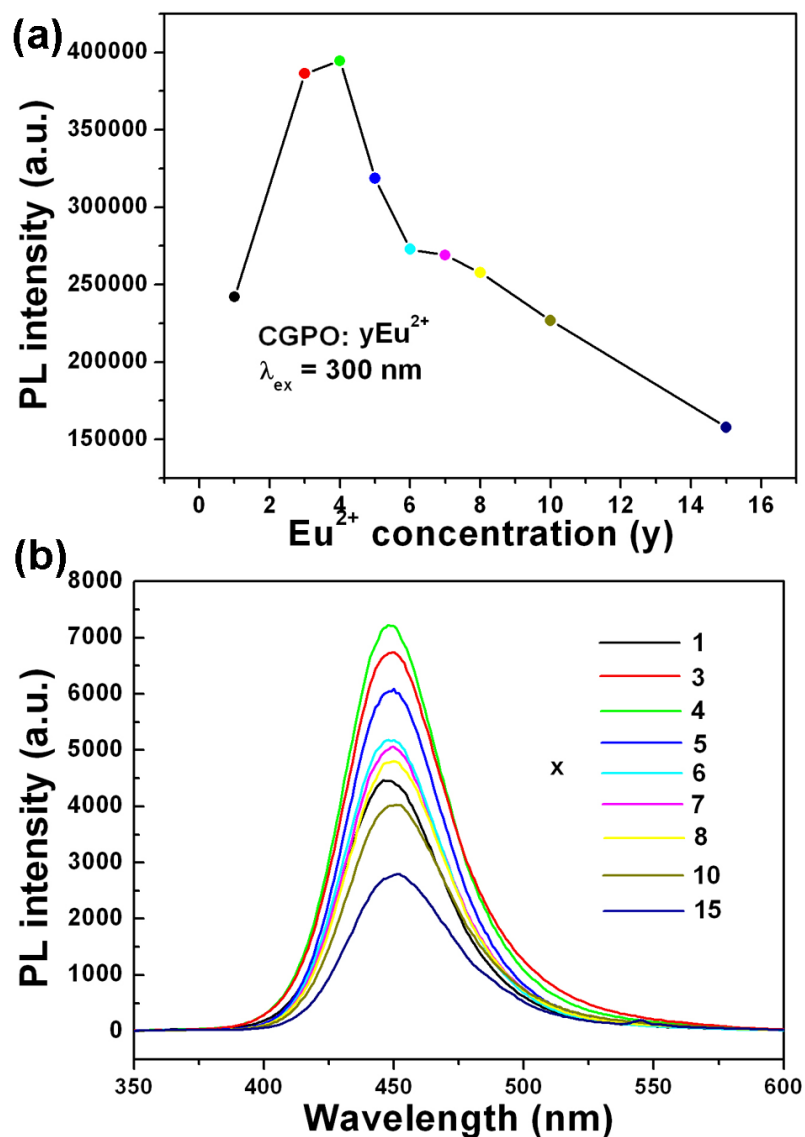

**Figure S3.** (a) The PL intensity of CGPO: yEu<sup>2+</sup> samples as a function of the Eu<sup>2+</sup> doping concentration (y). (b) The variation of PL spectra for CGPO: yEu<sup>2+</sup> samples with Eu<sup>2+</sup> concentration (y = 1-15) under 300 nm excitation.

5

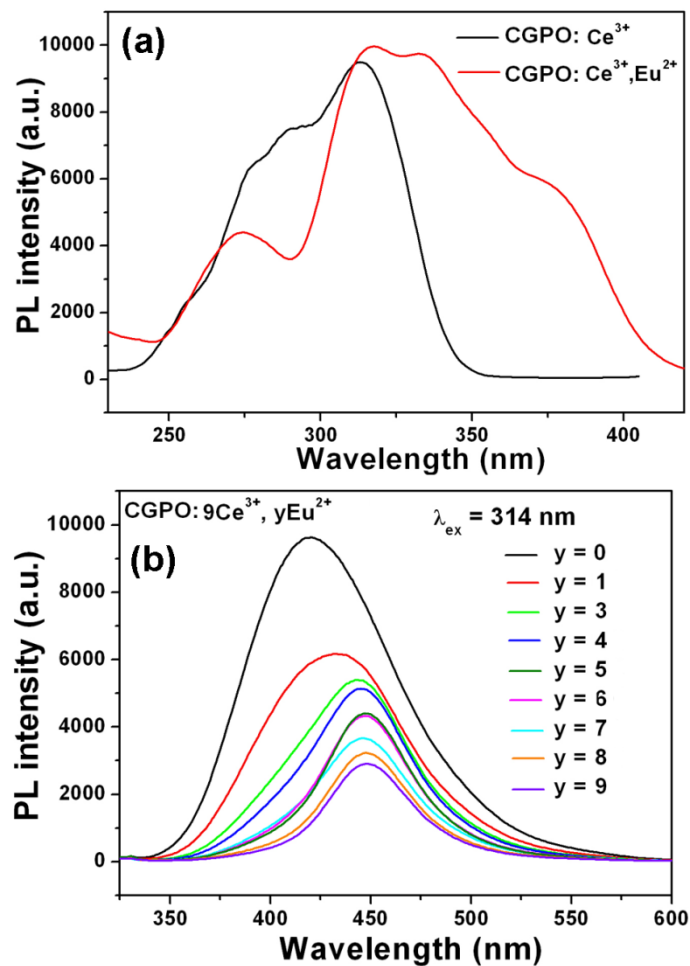

**Figure S4.** (a) The PLE spectra for CGPO: Ce<sup>3+</sup> (black line) ( $\lambda_{em} = 415$  nm) and CGPO: Ce<sup>3+</sup>, Eu<sup>2+</sup> ( $\lambda_{em} = 452$  nm) (red line) samples. (b) PL spectra for CGPO: 9Ce<sup>3+</sup>, yEu<sup>2+</sup> excited at 314 nm (y = 0-9).

15

20

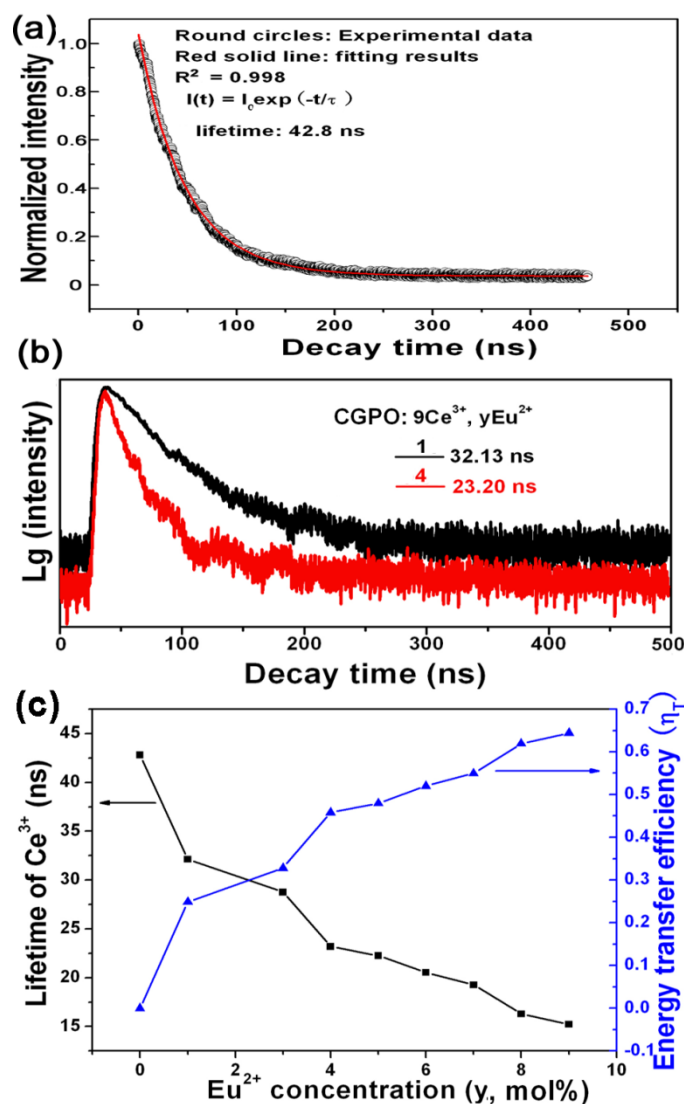

5

**Figure S5.** (a) Photoluminescence decay curve of Ce<sup>3+</sup> emission in CGPO: 9Ce<sup>3+</sup> and curve-fitting under excitation at 313 nm, monitored at 415 nm. (b) Representative photoluminescence decay curves of Eu<sup>2+</sup> in CGPO: 9Ce<sup>3+</sup>, yEu<sup>2+</sup> (y = 1, 4) displayed on a logarithmic intensity scale (excited at 314 nm, monitored at 415 nm). (c) Dependence of the energy transfer efficiency ( $\eta_T$ ) and the fluorescence lifetime of Ce<sup>3+</sup> on Eu<sup>2+</sup> content (y, mol%).

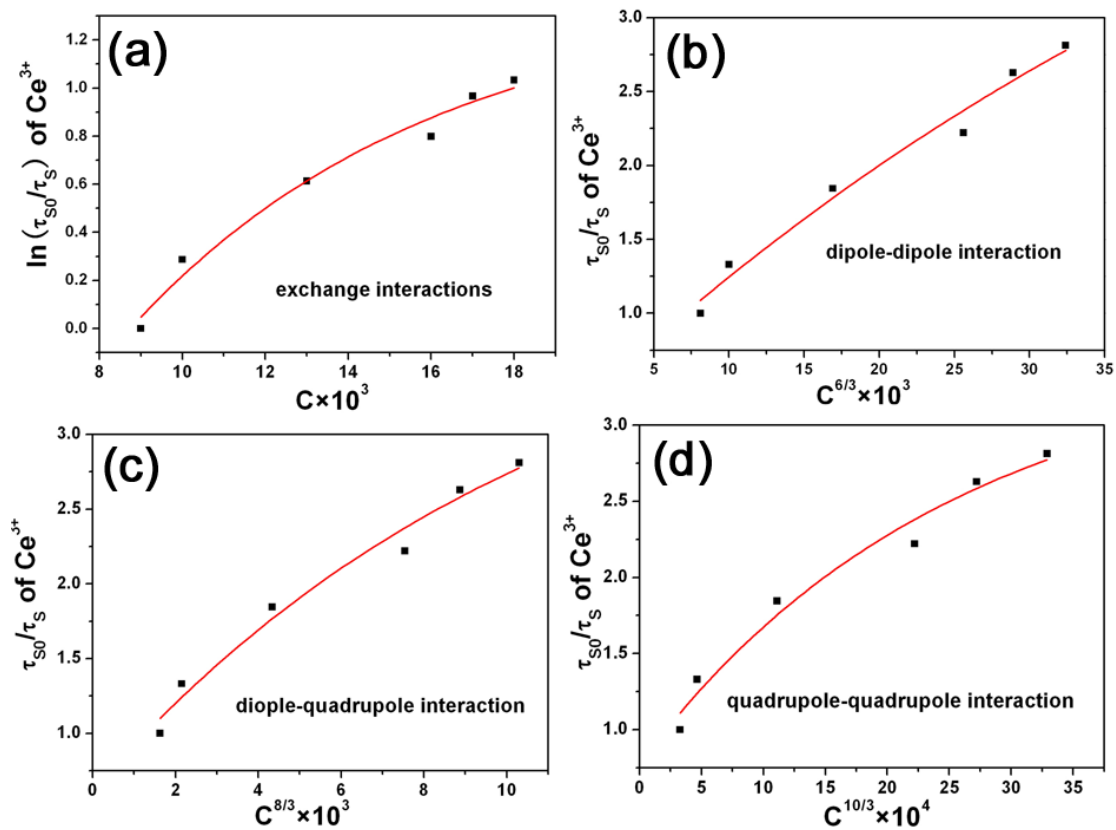

5

**Figure S6.** (a) Dependence of  $\ln(\tau_{s0}/\tau_s)$  of  $\text{Ce}^{3+}$  on  $C$ ; and  $\tau_{s0}/\tau_s$  of  $\text{Ce}^{3+}$  on (b)  $C^{6/3}$ , (c)  $C^{8/3}$  and (d)  $C^{10/3}$ .

10

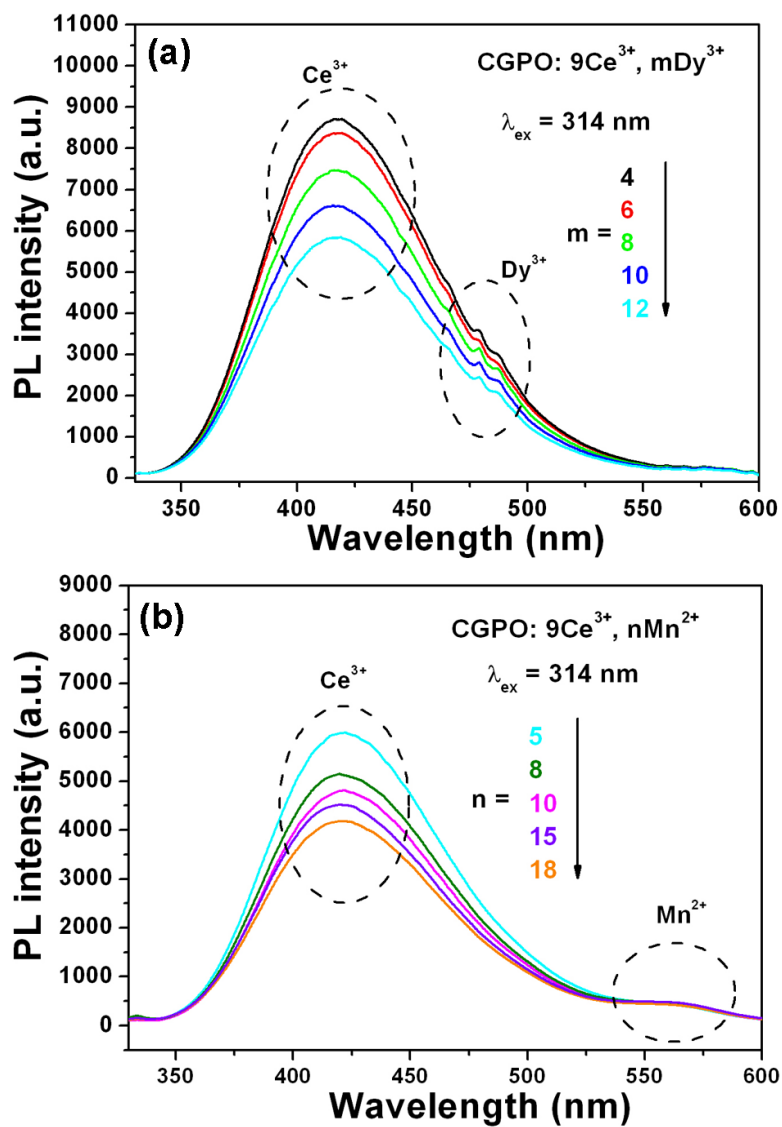

5

**Figure S7.** Representative PL spectra for (a) CGPO: 9Ce<sup>3+</sup>, mDy<sup>3+</sup> (m = 4, 6, 8, 10, 12) and (b) CGPO: 9Ce<sup>3+</sup>, nMn<sup>2+</sup> (n = 5, 8, 10, 15, 18) under 314 nm UV excitation.

10

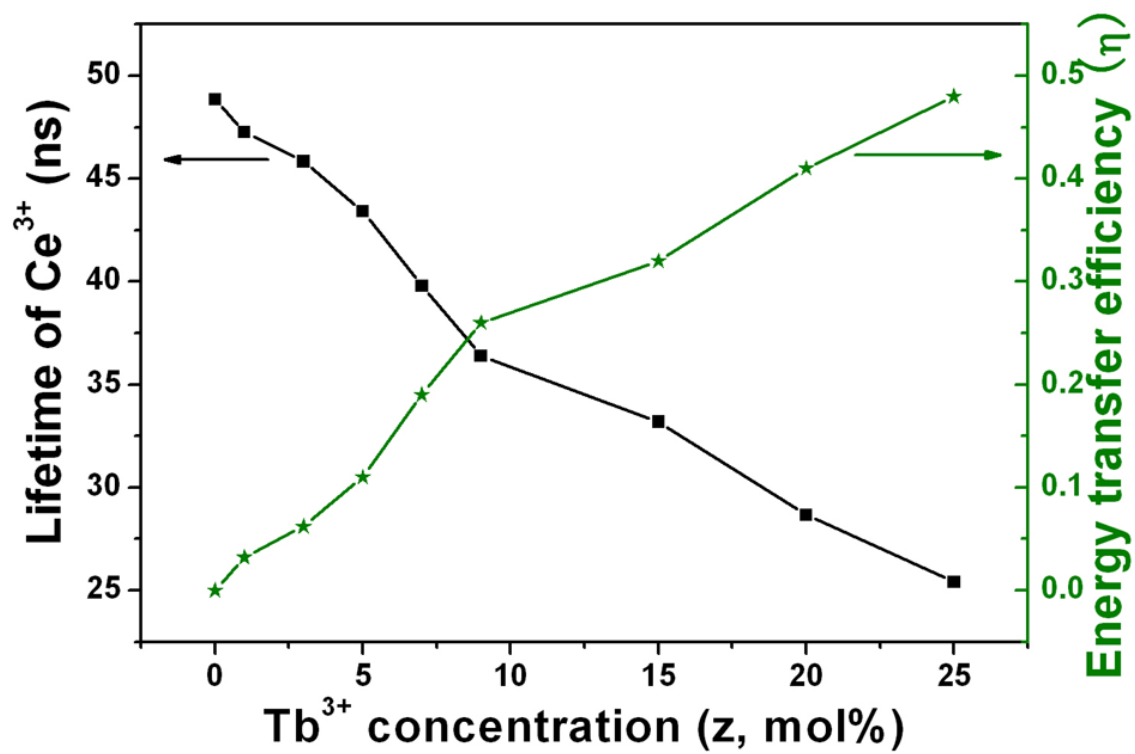

5

**Figure S8.** Dependence of the energy transfer efficiency ( $\eta$ ) and the fluorescence lifetime of Ce<sup>3+</sup> on Tb<sup>3+</sup> content (z, mol%).

10

5

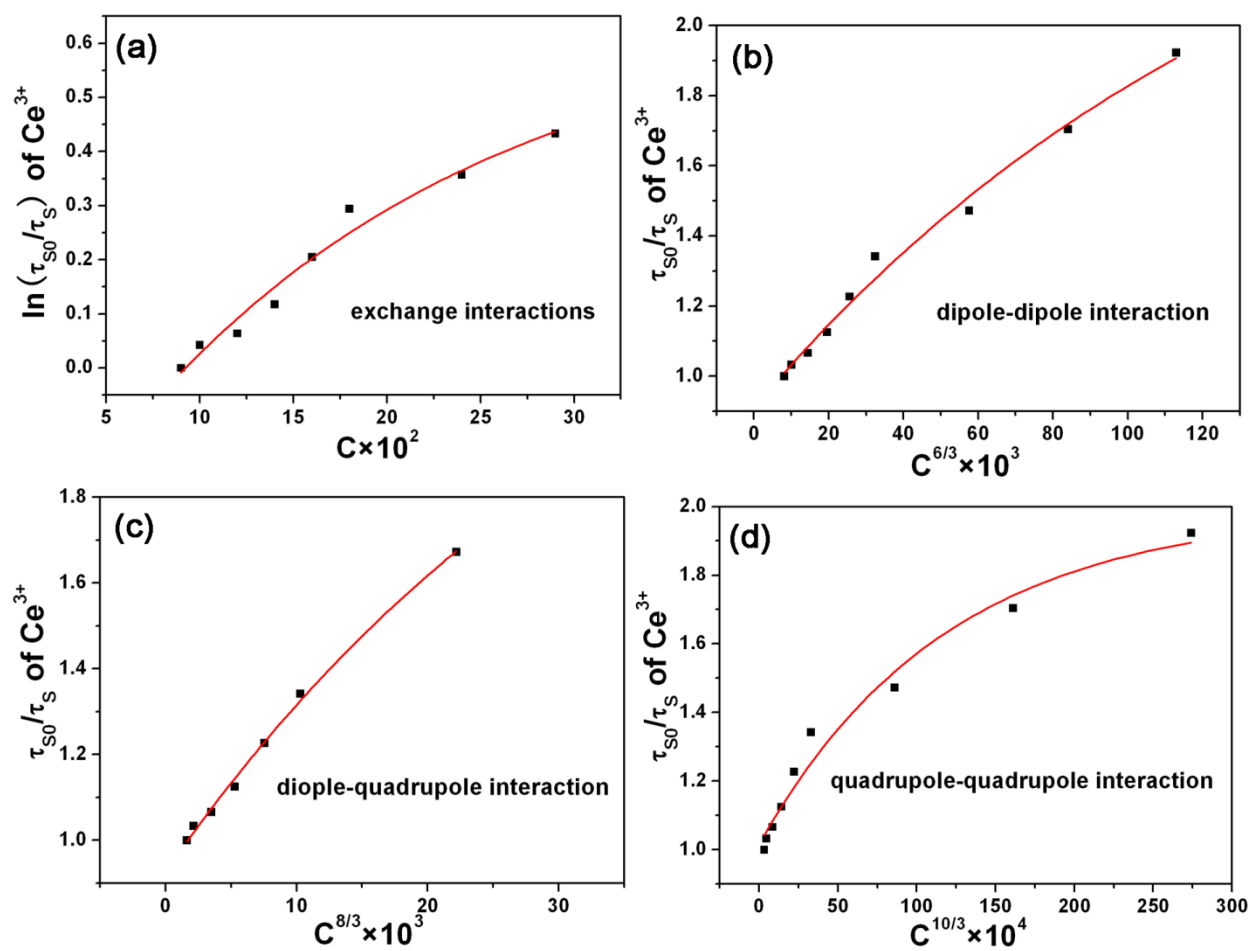

**Figure S9.** Dependence of (a)  $\ln(\tau_{S0}/\tau_S)$  of  $\text{Ce}^{3+}$  on  $C$ ; and  $\tau_{S0}/\tau_S$  of  $\text{Ce}^{3+}$  on (b)  $C^{6/3}$ , (c)  $C^{8/3}$  and (d)  $C^{10/3}$ .

10



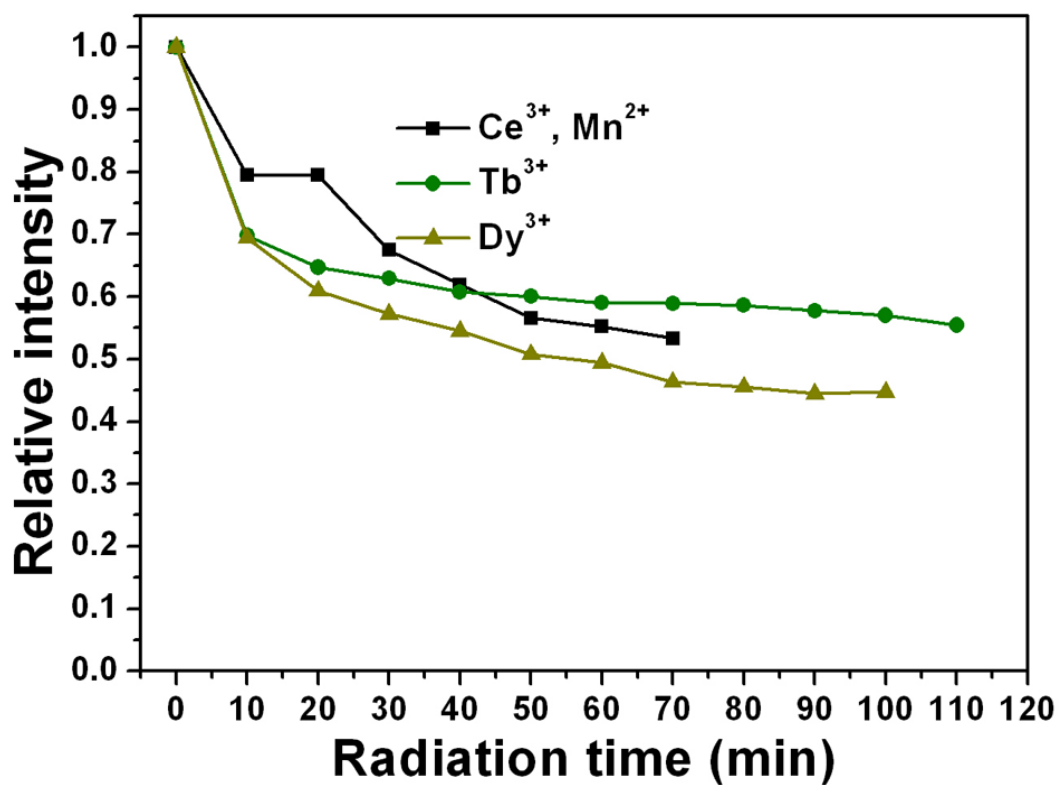

5

**Figure S10.** Dependence of relative CL intensity for the representative CGPO: Ce<sup>3+</sup>, Mn<sup>2+</sup>, CGPO: Tb<sup>3+</sup>, and CGPO: Dy<sup>3+</sup> samples on the radiation time under the accelerating voltage = 3.5kV, filament current = 90 mA electron beam excitation.
